# Supplementary material for: Measurement report: Year-long chemical composition, optical properties, and sources of atmospheric aerosols in the northeastern Tibetan Plateau
Source: Copernicus journal article supplement (doi:10.5194/acp-25-12433-2025), 2025-10-08
Supplement: Supplementary file 1 [file acp-25-12433-2025-supplement.pdf]

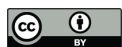

*Supplement of*

**Measurement report: Year-long chemical composition,  
optical properties, and sources of atmospheric aerosols  
in the northeastern Tibetan Plateau**

**Kemei Li et al.**

*Correspondence to:* Jianzhong Xu (jzxu78@sjtu.edu.cn, jzxu@lzb.ac.cn)

The copyright of individual parts of the supplement might differ from the article licence.

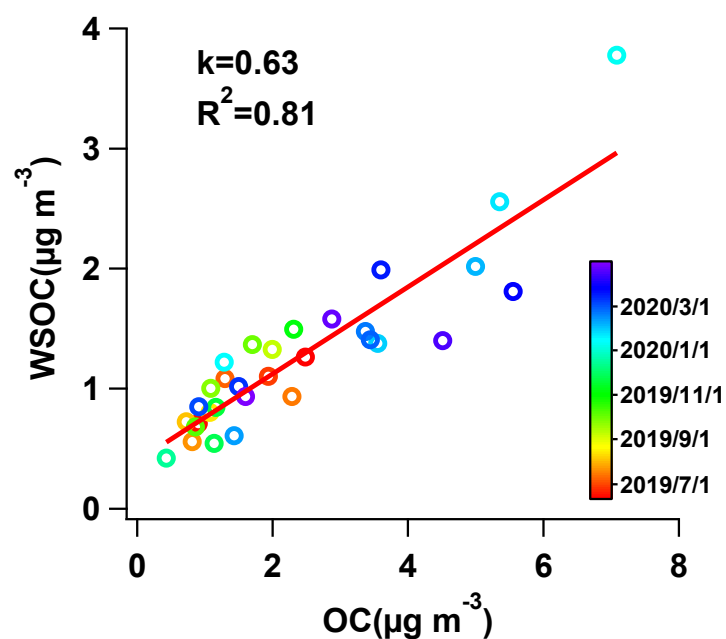

Figure S1 Scatter plot between WSOC and OC.

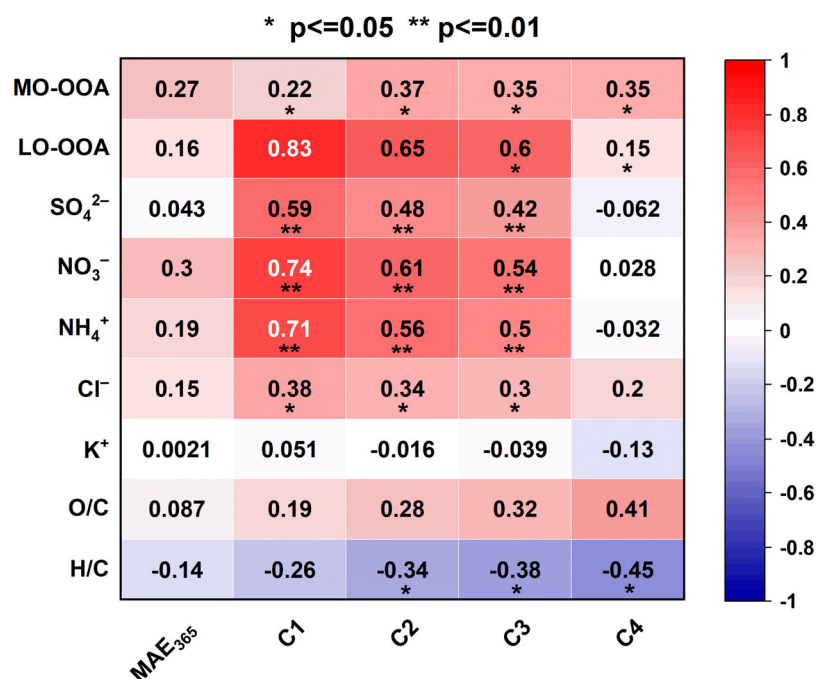

Figure S2 Correlation heat map of chemical components of PM<sub>2.5</sub> (SO<sub>4</sub><sup>2-</sup>, NO<sub>3</sub><sup>-</sup>, NH<sub>4</sub><sup>+</sup>, K<sup>+</sup>, Cl<sup>-</sup>, LO-OOA, MO-OOA), oxidation degree (O/C and H/C), and the four PARAFAC-derived fluorescent components (C1 – C4). The correlation coefficient and the results of the significance test are included.
